# Supplementary material
Source: publisher figshare collection journal article supplement (https://sage.figshare.com/ndownloader/files/39664621)
Supplement: Supplementary file 1 [file 39664621]

**Explanatory Memo for Data Files**

Dataset.sav = Cleaned, deidentified data file used for analyses.

Syntax.sps = SPSS syntax file with syntax for each study analyses.

Log_file = SPSS output with results from the study analyses
